# Conjugative Plasmids of *Neisseria gonorrhoeae*

Emilia Pachulec<sup>1,2</sup>, Chris van der Does<sup>1,2,3\*</sup>

**1** Department of Microbiology, Groningen Biomolecular Sciences and Biotechnology Institute, University of Groningen, Haren, The Netherlands, **2** Zernike Institute for Advanced Materials, University of Groningen, Haren, The Netherlands, **3** Department of Ecophysiology, Max Planck-Institute for Terrestrial Microbiology, Marburg, Germany

## Abstract

Many clinical isolates of the human pathogen *Neisseria gonorrhoeae* contain conjugative plasmids. The host range of these plasmids is limited to *Neisseria* species, but presence of a tetracycline (*tetM*) determinant inserted in several of these plasmids is an important cause of the rapid spread of tetracycline resistance. Previously plasmids with different backbones (Dutch and American type backbones) and with and without different *tetM* determinants (Dutch and American type *tetM* determinants) have been identified. Within the isolates tested, all plasmids with American or Dutch type *tetM* determinants contained a Dutch type plasmid backbone. This demonstrated that *tetM* determinants should not be used to differentiate between conjugal plasmid backbones. The nucleotide sequences of conjugative plasmids with Dutch type plasmid backbones either not containing the *tetM* determinant (pEP5233) or containing Dutch (pEP5289) or American (pEP5050) type *tetM* determinants were determined. Analysis of the backbone sequences showed that they belong to a novel IncP1 subfamily divergent from the IncP1 $\alpha$ ,  $\beta$ ,  $\gamma$ ,  $\delta$  and  $\epsilon$  subfamilies. The *tetM* determinants were inserted in a genetic load region found in all these plasmids. Insertion was accompanied by the insertion of a gene with an unknown function, and rearrangement of a toxin/antitoxin gene cluster. The genetic load region contains two toxin/antitoxins of the Zeta/Epsilon toxin/antitoxin family previously only found in Gram positive organisms and the virulence associated protein D of the VapD/VapX toxin/antitoxin family. Remarkably, presence of VapX of pJD1, a small cryptic neisserial plasmid, in the acceptor strain strongly increased the conjugation efficiency, suggesting that it functions as an antitoxin for the conjugative plasmid. The presence of the toxin and antitoxin on different plasmids might explain why the host range of this IncP1 plasmid is limited to *Neisseria* species. The isolated plasmids conjugated efficiently between *N. gonorrhoeae* strains, but did not enhance transfer of a genetic marker.

**Citation:** Pachulec E, van der Does C (2010) Conjugative Plasmids of *Neisseria gonorrhoeae*. PLoS ONE 5(4): e9962. doi:10.1371/journal.pone.0009962

**Editor:** Michael Otto, National Institutes of Health, United States of America

**Received:** January 27, 2010; **Accepted:** March 1, 2010; **Published:** April 1, 2010

**Copyright:** © 2010 Pachulec, van der Does. This is an open-access article distributed under the terms of the Creative Commons Attribution License, which permits unrestricted use, distribution, and reproduction in any medium, provided the original author and source are credited.

**Funding:** These authors have no support or funding to report.

**Competing Interests:** The authors have declared that no competing interests exist.

\* E-mail: does@mpi-marburg.mpg.de

## Introduction

The obligate human pathogen *Neisseria gonorrhoeae* colonizes mucosal tissues in the urogenital tracts to cause the sexually transmitted disease gonorrhea [1]. Although gonorrhea can still be treated with antibiotics it has progressively accumulated resistance against many antibiotics like e.g. penicillin, ciprofloxacin, tetracycline, azithromycin and cefixime, and currently not many new antibiotics are available [2]. The rapid spread of antibiotic resistance is caused by the high rate of horizontal gene transfer in *N. gonorrhoeae*, resulting in a panmictic population structure [3]. Horizontal gene transfer in *N. gonorrhoeae* is driven by its high rates of natural transformation and recombination. DNA for horizontal gene transfer is most likely derived from lysis, but transfer frequencies are approximately 500 fold increased in strains which secrete DNA via the Type IV secretion system found within the recently characterized Gonococcal Genetic Island (GGI) [4]. Horizontal gene transfer also occurs via conjugative plasmids, which can not only transfer their own DNA, but often can also co-mobilize chromosomal or plasmid DNA. Currently three types of gonococcal conjugative plasmids have been described in *N. gonorrhoeae*: a 24.5 MDa plasmid with no detectable marker, and two 25.2 MDa plasmids which contain the *tetM* determinant [5].

The 24.5 MDa plasmid (also called pLE2451) was first found in 1974 in the United States in clinical isolates of non-penicillinase

and penicillinase producing *N. gonorrhoeae* [6,7,8]. The host range of the 24.5 MDa plasmid is limited to *N. gonorrhoeae* and to some strains of *Neisseria cinerea* [9]. The 24.5 MDa plasmid was shown not to be involved in the mobilization of genomic DNA. In 1982, 25.2 MDa conjugative plasmids containing *tetM* determinants were identified in clinical isolates from the United States [10]. *TetM* determinants are transposon-borne determinants found in many organisms like e.g., *Streptococcus* [11], *Mycoplasma hominis* [12], *Ureaplasma urealyticum* [13], *Enterococcus* spp [14] and *Gardnerella vaginalis* [5,15] and are responsible for high levels of tetracycline resistance. The *tetM* determinants within the 25.2 MDa plasmids are derived from a so-called class II Tn916-like transposon insertion which means that large parts of the Tn916-like transposon are deleted but that the *tetM* determinant is maintained [16]. Nowadays, gonococcal isolates resistant to high doses of tetracycline (MIC > 8 µg/ml) carrying 25.2 MDa plasmids have been isolated worldwide [5,17,18,19]. Restriction endonuclease mapping and Southern blotting of conjugative plasmids from different isolates revealed two different 25.2 MDa conjugative plasmids [18], which were named the “American” and “Dutch” type plasmids [20]. The restriction map of the Dutch type plasmid strongly resembled the restriction map of the 24.5 MDa conjugative plasmid and it was proposed that the Dutch type 25.2 MDa plasmid is a derivative of the 24.5 MDa plasmid by an insertion of the *tetM* determinant [5,21]. Early studies proposed

that the American type plasmid might be similar to both the conjugative and the Dutch type plasmid in areas of conserved functions like replication, incompatibility and transfer function [18], but restriction endonuclease mapping demonstrated large differences between American and Dutch type plasmids [22]. Sequencing of the *tetM* regions of American and Dutch type plasmids also revealed differences within the two *tetM* determinants, and it was proposed that the *tetM* determinant found in the American type conjugative plasmids has a different origin from the *tetM* determinant present in the Dutch type conjugative plasmids [23]. In a different study 13 American *tetM* determinants were linked to the restriction maps of American type conjugative plasmids [20]. Based on the different *tetM* sequences PCR primers were developed which could differentiate between the 2 different *tetM* determinants. The *tetM* determinant has been generally linked to the conjugation plasmid type, although some *tetM* determinants have also been identified in plasmids with restriction maps that differ from the initially identified American and Dutch types, indicating that either the American and Dutch type plasmids are still evolving or that the different *tetM* determinants have been inserted into different families of conjugative plasmids [20]. Unfortunately, it is unclear in many of the studies whether Dutch or American type plasmids were used, and whether differences would be observed between these two types of plasmids. 25.2 MDa plasmids showed a broader host range than the 24.5 MDa plasmid and could be transferred to other *Neisseria* species like *Neisseria cinerea*, *Neisseria meningitidis*, *Neisseria mucosa*, *Neisseria flava*, *Neisseria lactamica*, *Neisseria flavescens*, *Neisseria subflava*, and *Neisseria perflava* [17]. Plasmids carrying the *tetM* determinant were also identified in tetracycline-resistant *Neisseria meningitidis*, *Kingella denitrifera* and *Eikenella corrodens* while *Neisseria subflava* biovar *perflava*, *Neisseria sicca* and *Neisseria mucosa* isolates carried the *tetM* determinant in the chromosome [24]. The 25.2 MDa conjugative plasmid can also be transferred to *Escherichia coli*, but can not be maintained in this species [25].

The conjugative plasmids were also shown to be involved in the mobilization of small non selftransmissible  $\beta$ -lactamase gonococcal plasmids [26]. Mobilization by the conjugative plasmids was observed after short mating to other *Neisseria* species, to *Haemophilus influenzae* and to restriction-deficient *Escherichia coli* [27]. Mobilization occurs either via the *oriT*-binding MobA mobilization protein [28] or with lower efficiency via co-integration with the conjugative plasmid [25]. Interestingly some plasmids can only be mobilized by a 25.2 MDa conjugative plasmid and not by the 24.5 MDa plasmid [29].

These gonococcal conjugative plasmids have been studied for many years, and in this paper we demonstrate that within our isolates both Dutch and American type *tetM* determinants are found in plasmids with a Dutch type backbone. The sequence of the Dutch type backbone, and the sequences of the genetic load regions in which the Dutch and American type *tetM* determinants were inserted were determined. Based on these obtained sequences the plasmids were further characterized, and their involvement in DNA transport was compared to the type IV DNA secretion system encoded within the Gonococcal Genetic Island.

## Results

### Isolation and sequencing of a conjugal plasmid with a Dutch type *tetM* determinant

We set-out to study the conjugative plasmids of *N. gonorrhoeae*. A collection of 60 strains from low-passage clinical isolates was obtained from the Municipal Health Service, GG&GD in Amsterdam, The Netherlands. The strains were obtained from

the proctum, the cervix, the urethra, and the tonsil. This collection was a selection of strains resistant to the fluoroquinolones: ciprofloxacin and oxacillin, tetracycline, penicillin, and strains resistant to all these antibiotics (see table 1). These strains were tested for the presence of the Dutch and American type *tetM* determinants by two different PCR amplification methods described previously [30,31]. The results for both PCR methods agreed for all samples. Within 42 isolates tested 6 contained the American type *tetM* determinant and 6 contained the Dutch type *tetM* determinant. As expected, the *tetM* determinants were only detected in the strains with resistance above 1  $\mu$ g/ml tetracycline. *Neisseria* strain 5289 carrying the Dutch type *tetM* determinant was chosen for plasmid isolation. Analysis of the isolated plasmid by gel electrophoresis identified products running at  $\sim$ 40 kb,  $\sim$ 10 kb and  $\sim$ 4 kb. Both the 40 kb and 10 kb products hybridized with a Dutch type *tetM* probe after Southern blotting, demonstrating that they are two differently coiled forms of the plasmid. The product at  $\sim$ 4 kb was pJD1, a 4.207-kb cryptic plasmid, found in most *N. gonorrhoeae* strains [32]. To confirm that the isolated plasmid was the Dutch type plasmid, digestion with *Bgl*I was performed and the obtained digestion pattern was similar to the previously observed pattern for a Dutch type plasmid [20]. To test the efficiency of transfer of the plasmid of strain 5289, the plasmid was first conjugated to our laboratory strain MS11, and overnight matings were performed in liquid medium and on filters. The mating efficiency was high ( $10^{-1}$  transconjugants/donor) and liquid mating was as efficient as surface mating. The plasmid was sequenced via the shotgun method with at least 6 times coverage followed by gap closure based on PCR amplification. Complete sequencing of the plasmid (pEP5289) resulted in a sequence of 42,004 bp. The plasmid has a G+C content of 48%, compared to 52.7% for the *N. gonorrhoeae* chromosome and 44% for the horizontally acquired Gonococcal Genetic Island. The sequence was identical to contig NZ\_ABZP01000196 of *N. gonorrhoeae* strain SK-92-67 obtained during the recent sequencing of 15 different *N. gonorrhoeae* strains. The plasmid contained 3 DNA Uptake Sequences (DUS) which is a 14-fold lower frequency than observed for the *N. gonorrhoeae* chromosome. Manual annotation revealed 48 open reading frames (see table 2). Analysis of the annotated open reading frames, revealed a modular structure typical for the IncPI plasmids. The plasmid is organized in modules for replication initiation (Rep), conjugative DNA-transfer (Tra), mating-pair-formation (Trb), stable plasmid inheritance and control (Cti) (see figure 1). Furthermore, the plasmid contains a 'genetic load' module containing several genes inserted between the Trb and Tra regions.

### Analysis of the sequence of conjugative plasmids with the American *tetM* determinant

Since the restriction patterns of the Dutch and American type conjugative plasmids showed some overlap [18], we tried to detect the presence of the different regions of the Dutch type plasmid in the isolates containing the American type *tetM* determinant. Region specific PCRs targeting the conjugative DNA-transfer (*traE*, *traD* and *traI*), mating-pair-formation (*trbB*, *trbC*, *trbD*, *trbE* and *trbI*), replication (*trfA* and *ssb*), stable plasmid inheritance and control (*korC*, *traN*, *traO*) regions and the regions used for gap closing of the initial sequences gave PCR fragments for all 6 isolates containing the American type tetracycline plasmid. Sequencing of the above regions revealed that these regions were 100% similar with the sequences determined for the plasmid with the Dutch *tetM* determinant. Isolation and restriction with *Bgl*I of the plasmids with the American type *tetM* determinant confirmed that these plasmids indeed contained the plasmid backbone of

**Table 1.** Characteristics of clinical isolates used in this study (S-sensitive).

| Isolate nr | Material source | Ciprofloxacin MIC µg/ml | Tetracyclin MIC µg/ml | Penicillin MIC µg/ml | GGI presence | type of plasmid |
|------------|-----------------|-------------------------|-----------------------|----------------------|--------------|-----------------|
| 4314       | urethra         | 2                       | S                     | S                    | —            | Conjugative     |
| 4465       | proctum         | 4                       | S                     | S                    | +            | Conjugative     |
| 4485       | urethra         | 3                       | S                     | S                    | —            | Conjugative     |
| 4511       | proctum         | 3                       | S                     | S                    | —            | Conjugative     |
| 4518       | urethra         | 0.5                     | S                     | 0.75                 | +            | Conjugative     |
| 4603       | proctum         | 6                       | S                     | S                    | —            | Conjugative     |
| 4890       | urethra         | 1.5                     | S                     | S                    | —            | Conjugative     |
| 4892       | urethra         | 1                       | S                     | S                    | —            | Conjugative     |
| 4894       | proctum         | 0.75                    | S                     | S                    | —            | Conjugative     |
| 5308       | urethra         | 8                       | S                     | S                    | —            | Conjugative     |
| 4393       | proctum         | S                       | 1                     | 2                    | —            | American        |
| 4703       | cervix          | S                       | 6                     | >32                  | +            | Dutch           |
| 4731       | urethra         | S                       | 0.38                  | S                    | +            | Not detected    |
| 5050       | urethra         | S                       | 64                    | S                    | —            | American        |
| 5135       | proctum         | S                       | 16                    | S                    | +            | American        |
| 5289       | urethra         | S                       | 24                    | S                    | +            | Dutch           |
| 5291       | cervix          | S                       | >256                  | S                    | —            | American        |
| 5351       | urethra         | S                       | 24                    | S                    | +            | Dutch           |
| 5371       | urethra         | S                       | 16                    | >32                  | —            | Dutch           |
| 4290       | urethra         | S                       | 8                     | 0.125                | +            | American        |
| 4415       | tonsil          | S                       | S                     | 3                    | —            | Conjugative     |
| 4458       | cervix          | S                       | S                     | 12                   | +            | Conjugative     |
| 4547       | urethra         | S                       | 24                    | 8                    | +            | Dutch           |
| 4635       | urethra         | 2                       | S                     | >32                  | —            | Conjugative     |
| 4722       | urethra         | S                       | S                     | 2                    | +            | Not detected    |
| 4993       | urethra         | 2                       | S                     | 0.19                 | +            | Conjugative     |
| 5224       | urethra         | S                       | 16                    | 24                   | +            | American        |
| 5233       | urethra         | S                       | S                     | 6                    | +            | Conjugative     |
| 5259       | proctum         | S                       | S                     | 0.75                 | +            | Conjugative     |
| 5343       | urethra         | S                       | 8                     | 24                   | +            | Dutch           |
| 4305       | proctum         | S                       | S                     | S                    | +            | Not detected    |
| 5312       | proctum         | S                       | S                     | S                    | +            | Not detected    |
| 4392       | tonsil          | S                       | S                     | S                    | +            | Not detected    |
| 4308       | urethra         | S                       | S                     | S                    | +            | Not detected    |
| 4745       | urethra         | S                       | S                     | S                    | +            | Conjugative     |
| 4818       | tonsil          | S                       | S                     | S                    | +            | Conjugative     |
| 5020       | urethra         | S                       | S                     | S                    | —            | Not detected    |
| 5065       | proctum         | S                       | S                     | S                    | +            | Not detected    |
| 5066       | urethra         | S                       | S                     | S                    | +            | Conjugative     |
| 5067       | cervix          | S                       | S                     | S                    | +            | Not detected    |
| 5284       | urethra         | S                       | S                     | S                    | +            | Not detected    |
| 5375       | urethra         | S                       | S                     | S                    | +            | Not detected    |

doi:10.1371/journal.pone.0009962.t001

Dutch type conjugative with the American type *tetM* determinant integrated (data not shown). The region from the *zeta\_1* gene to the *ngonSK11390* gene of a plasmid (pEP5050) with an American type *tetM* determinant and a Dutch type plasmid backbone isolated from clinical isolate 5050 was amplified and sequenced. Sequencing of this region revealed that the only difference between the two

plasmids is the presence of a region with homology to the transposon Tn916 in the plasmid with the American type *tetM* determinant (see figure 2). This difference was reported previously for plasmids with the American type *tetM* determinant in an American type conjugative plasmid [16]. The *tetM* and the *ngonSK11390* gene show 96% and 99% identity with the genes

**Table 2.** Annotation of open reading frames located within the neisserial conjugative plasmid (pEP5289) with a Dutch type *tetM* determinant and a Dutch type backbone.

| gene             | length (bp) | homologue of putative protein                                    | identity/range (aa) | function of homologue                                            |
|------------------|-------------|------------------------------------------------------------------|---------------------|------------------------------------------------------------------|
| <i>trbA</i>      | 366         | TrbA of <i>Pseudomonas aeruginosa</i>                            | 50%/116             | transcriptional repressor                                        |
| <i>trbB</i>      | 999         | TrbB of <i>Legionella pneumophila</i> str. Corby                 | 55%/292             | VirB11 like conjugal transfer ATPase (VirB11)                    |
| <i>trbC</i>      | 384         | TrbC of plasmid pB3                                              | 72%/112             | Prepilin (putatively circularized by TraF)                       |
| <i>trbD</i>      | 318         | TrbD of <i>Xylella fastidiosa</i>                                | 59%/103             | conjugal transfer                                                |
| <i>trbE</i>      | 2565        | TrbE of Birmingham IncP-alpha plasmid                            | 60%/853             | VirB4-like conjugal transfer ATPase                              |
| <i>trbF</i>      | 708         | TrbF of <i>Azoarcus</i> sp. EbN1                                 | 55%/230             | DNA transfer                                                     |
| <i>trbG</i>      | 867         | TrbG of <i>Azoarcus</i> sp. EbN1                                 | 53%/275             | VirB9-like Core complex component                                |
| <i>trbH</i>      | 411         | TrbH of IncP-1 plasmid pJKJ5                                     | 33%/151             | VirB7-like Core complex component                                |
| <i>trbI</i>      | 1440        | TrbI of <i>Acidovorax</i> sp. JS42                               | 46%/477             | VirB10-like Core complex component                               |
| <i>trbJ</i>      | 777         | TrbJ of <i>Bordetella pertussis</i>                              | 48%/226             | VirB5                                                            |
| <i>trbK</i>      | 141         |                                                                  |                     |                                                                  |
| <i>trbL</i>      | 1629        | TrbL of <i>Azoarcus</i> sp. EbN1                                 | 46%/215             | VirB6-like inner membrane protein                                |
| <i>trbM</i>      | 579         | TrbM of <i>Bordetella pertussis</i>                              | 48%/154             | conjugal transfer                                                |
| <i>trbN</i>      | 600         | TrbN of <i>Sphingomonas</i> sp. A1                               | 49%/207             | lytic transglycosylase                                           |
| <i>vapD</i>      | 333         | VapD of <i>Haemophilus somnus</i>                                | 73%/84              | virulence-associated protein D                                   |
| <i>ResA</i>      | 555         | resolvase of <i>Azotobacter vinelandii</i> DJ                    | 56%/183             | resolvase                                                        |
| <i>MarR</i>      | 432         | ESA_01699 of <i>Enterobacter sakazakii</i> ATCC BAA-894          | 28%/27              | transcriptional regulator, MarR family                           |
| <i>Zeta-1</i>    | 1206        | CAMGR0001_1552 of <i>Campylobacter gracilis</i> RM3268           | 50%/280             | Zeta toxin                                                       |
| <i>Epsilon-1</i> | 186         |                                                                  |                     | Epsilon antitoxin                                                |
| <i>Zeta-2</i>    | 1209        | Zeta toxin protein of <i>Verminephrobacter eiseniae</i> EF01-2   | 41%/296             | Zeta toxin                                                       |
| <i>Epsilon-2</i> | 255         | Bcen2424_6818 of <i>Burkholderia cenocepacia</i>                 | 30%/69              | Epsilon antitoxin                                                |
| <i>11375</i>     | 522         | GCWU000324_02316 of <i>Kingella oralis</i> ATCC 51147            | 40%/77              | Hypothetical                                                     |
| <i>tetM</i>      | 1935        | TetM of <i>Streptococcus pneumoniae</i>                          | 98%/644             | tetracycline resistance                                          |
| <i>11390</i>     | 474         | Bcen2424_6818 of <i>Burkholderia cenocepacia</i>                 | 29%/72              | Epsilon antitoxin?                                               |
| <i>11395</i>     | 897         | YpIP275_pIP1202_0130 of <i>Yersinia pestis</i> biovar Orientalis | 63%/297             | DNA modification methylase                                       |
| <i>11400</i>     | 342         | NmucA2_00935 <i>Neisseria mucosa</i> ATCC 25996                  | 36%/103             | Hypothetical                                                     |
| <i>11405</i>     | 369         | HMPREF0530_1319 <i>Lactobacillus paracasei</i>                   | 36%/100             | Hypothetical                                                     |
| <i>11410</i>     | 360         | NgonSK11410 of <i>Neisseria gonorrhoeae</i> SK-92-679            | 100%/119            | Hypothetical                                                     |
| <i>yegA</i>      | 558         | YegA of <i>Neisseria gonorrhoeae</i> NCCP11945                   | 40%/163             | Conserved hypothetical with TAT signal sequence and DUF88 domain |
| <i>11420</i>     | 471         | DR_0894 of <i>Deinococcus radiodurans</i> R1                     | 28%/88              | transcription elongation factor                                  |
| <i>traC</i>      | 3000        | TraC of IncP-1 plasmid pJKJ5                                     | 46%/1032            | DNA primase                                                      |
| <i>traD</i>      | 165         | BACUNI_04470 of <i>Bacteroides uniformis</i> ATCC                | 56%/25              | conjugal transfer                                                |
| <i>traE</i>      | 2196        | TraE of Birmingham IncP-alpha plasmid                            | 58%/734             | DNA topoisomerase III family                                     |
| <i>traF</i>      | 513         | TraF of <i>Bordetella pertussis</i>                              | 40%/166             | conjugal prepilin peptidase                                      |
| <i>traG</i>      | 1890        | TraG of <i>Bordetella pertussis</i>                              | 69%/621             | conjugal coupling protein                                        |
| <i>tral</i>      | 2394        | Tral of plasmid pB3                                              | 34%/809             | DNA relaxase                                                     |
| <i>traJ</i>      | 378         | TraJ of plasmid QKH54                                            | 45%/109             | oriT-binding protein                                             |
| <i>traK</i>      | 420         | XfasM23_2251 of <i>Xylella fastidiosa</i>                        | 30%/113             | DNA transfer                                                     |
| <i>traL</i>      | 726         | TraL of <i>Xylella fastidiosa</i> Dixon                          | 48%/241             | conjugal transfer                                                |
| <i>traM</i>      | 483         | TraM of <i>Legionella drancourtii</i> LLAP12                     | 22%/110             | DNA transfer                                                     |
| <i>kfrC</i>      | 537         | KfrC of <i>Pseudomonas aeruginosa</i>                            | 48%/148             | plasmid partitioning                                             |
| <i>kfrB</i>      | 357         | TraO of <i>Bordetella pertussis</i>                              | 41%/86              | plasmid partitioning                                             |
| <i>korB</i>      | 918         | ParB of <i>Xylella fastidiosa</i> Dixon                          | 48%/327             | plasmid partitioning DNA binding protein                         |
| <i>incC</i>      | 756         | IncC2 of Birmingham IncP-alpha plasmid                           | 54%/257             | plasmid partitioning ATP binding protein                         |
| <i>kleE</i>      | 246         | KleE of <i>Bordetella pertussis</i>                              | 28%/76              | plasmid partitioning                                             |
| <i>korC</i>      | 348         | KorC of <i>Bordetella pertussis</i>                              | 36%/75              | plasmid partitioning, regulator                                  |
| <i>trfA</i>      | 879         | TrfA of <i>Nitrosomonas eutropha</i> C91                         | 47%/265             | plasmid replication, oriV activator                              |
| <i>ssb</i>       | 384         | Ssb of <i>Xylella fastidiosa</i> M23                             | 37%/115             | single-strand DNA binding protein                                |

doi:10.1371/journal.pone.0009962.t002

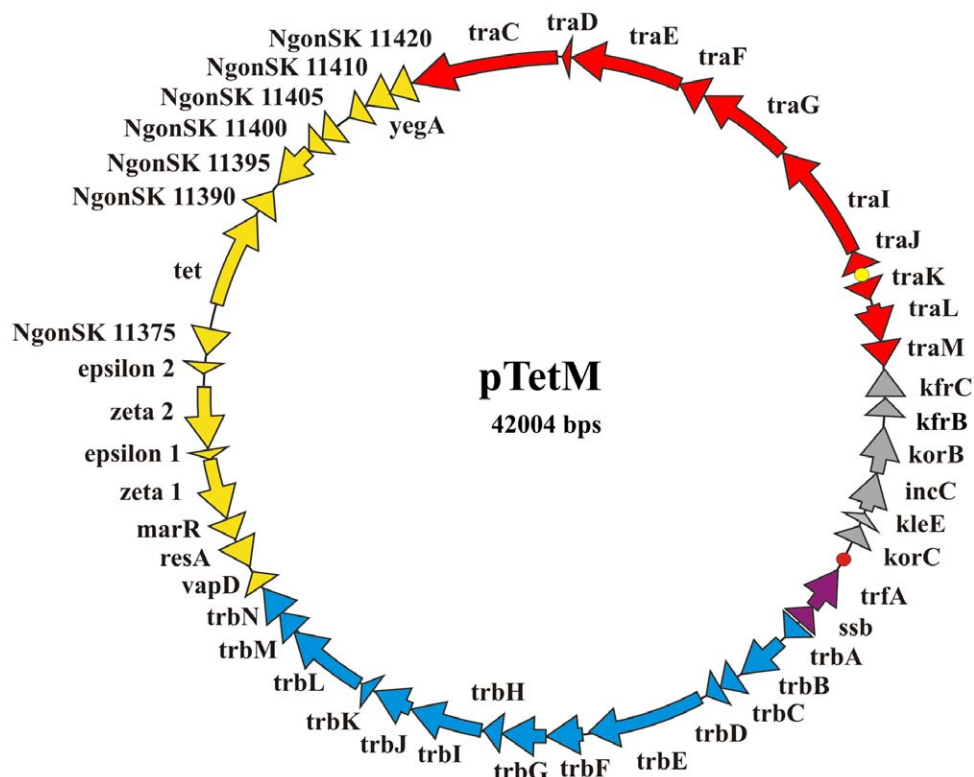

**Figure 1. Circular map of the Neisserial conjugative plasmid (pEP5289) with the Dutch type *tetM* determinant and a Dutch type backbone.** The open reading frames are colored as follows: red, conjugative transfer (*tra*); blue, mating pair formation (*trb*); purple, replication initiation (*rep*); grey inheritance/control (*ctl*) and yellow, genetic load. The origin of replication (*oriV*) and the origin of transfer (*oriT*) are indicated with red and yellow circles respectively.

doi:10.1371/journal.pone.0009962.g001

present in the Dutch type plasmid, while the other genes were 100% identical (see Figure S1). Dutch type conjugative plasmids with an American type *tetM* determinant have been observed before at low frequency [33], but our results show that in our Dutch isolates, they occur with a very high frequency. Importantly, this shows that the *tetM* determinant is not a good marker to differentiate between conjugative plasmids with American and Dutch type backbones.

#### Plasmids with *tetM* determinants are derived from the 24.5 MDa conjugative plasmid

Since it was proposed that the 25.2 MDa plasmid with a Dutch type backbone is a derivative of the 24.5 MDa conjugative plasmid by an insertion of the Dutch type *tetM* determinant [5,21], it was tried to detect the presence of the different regions of the Dutch type plasmid described above in the isolates which were not positive for the presence of the Dutch and American *tetM* determinants. Remarkably, in 19/30 isolates the presence of the different regions could be detected, showing that 31/42 of our isolates contain a conjugative plasmid with a Dutch type backbone (see table 1). Again, sequencing of the above regions revealed that these regions were 100% similar with the sequences determined for the plasmid with the Dutch *tetM* determinant. This demonstrated that the conjugative plasmids with Dutch and American type *tetM* determinants are derived from the 24.5 MDa conjugative plasmid by insertion of the *tetM* determinant.

When the antibiotic resistance spectrum of the different clinical isolates was compared with the presence or absence of the conjugative plasmids, it was remarkable that all strains with resistance against the fluoroquinolones ciprofloxacin and oxacillin

contained a conjugative plasmid. Resistance to fluoroquinolones is generally a result of point mutations in the DNA gyrase *gyrA* or the topoisomerase IV *parC* genes [34]. However, there is no clear indication in the plasmid sequence that would explain a correlation between presence of the conjugal plasmid and the resistance to fluoroquinolones.

To determine the exact position of the insertion of the *tetM* determinants in the conjugative plasmid, the region between the *zeta\_1* and the *ngoSK11390* gene of plasmid pEP5233, a conjugative plasmid with a Dutch type backbone isolated from clinical isolate 5233 was amplified and sequenced. Alignment of the sequences (see Figure S1) showed that sequences outside the *epsilon\_1* and the *ngoSK11390* genes are conserved between this plasmid (pEP5233) and the plasmids with the *tetM* determinant (pEP5289 and pEP5050) but that differences are found in the region between these genes (see figure 2). Conservation of 300 and 109 bp long regions in all three plasmids suggests that three insertions/rearrangements have taken place: I) insertion of the *tetM* determinant (with or without the Tn916 transposon), and II) insertion of the *ngoSK11375* gene and III) a rearrangement/mutagenesis of the *zeta\_2/epsilon\_2* genes to the *zeta\_3/epsilon\_3* genes. A more detailed analysis of the genetic load regions of these plasmids will be given below.

#### The conjugative plasmids with the Dutch type backbone are phylogenetically divergent from the other IncP1 sub-families

The modular arrangement of the conjugative plasmid and derivatives thereof, the absence of several genes often found in the

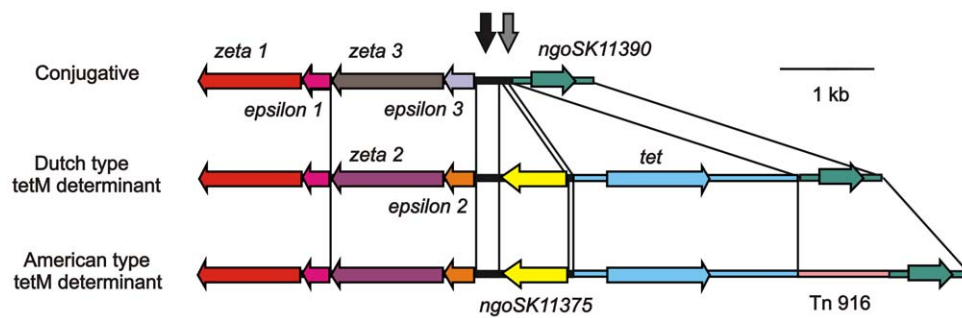

**Figure 2. Comparison of the genetic load regions of the conjugative plasmid, and the plasmids with the American and Dutch *tetM* determinants.** The genetic load region between *zeta\_1* and *ngoSK11390* is shown. Conserved regions are depicted in similar colors. Regions of 300 and 109 bps which are maintained after insertion of *ngoSK11375* are depicted by the black and grey arrows respectively.  
doi:10.1371/journal.pone.0009962.g002

IncP1- $\alpha$  subfamily, and an insertion of an additional module suggested that these plasmids are members of the IncP1- $\beta$  subfamily. To verify placement of the plasmids in the IncP1- $\beta$  subfamily, a phylogenetic analysis was performed on the TraI and TraG proteins encoded in the Tra region, the TrbE and TrbC proteins encoded in the Trb region, and the TrfA and KorB proteins encoded within the Rep and Ctl regions. Neighbor-joining tree containing representative members of the different IncP1 plasmid subfamilies ( $\alpha$ , RP4;  $\beta$ , pADP-1;  $\gamma$ , QKH54;  $\delta$ , pEST4011 and  $\epsilon$ , pKJK5) and the neisserial conjugative plasmids with the Dutch type backbone were created (See figure 3). Remarkably this showed that these neisserial conjugative plasmids fall within the IncP1 family, but are phylogenetically divergent from the other IncP1 sub-families, and are members of a new subfamily.

### Analysis of the open reading frames of the IncP backbone

The conjugative DNA-transfer (Tra) region contains the transfer proteins, encoded in two oppositely transcribed *traCDEF-GHIJ* and *traKLM* operons, and is similar to the other IncP-1 family plasmids. The origin of transfer (*oriT*), including the *nic* site is in plasmids of the IncP family located between these two operons [35]. This region also contains an inverted repeat sequence, which is the binding sequence for TraJ. The sequence in this region of the Neisserial conjugative plasmids differs significantly from the sequences observed in other IncP1 subfamilies. A putative *nic* site and an inverted repeat sequence are present, but the sequence of the inverted repeat to which TraJ putatively binds seems not to be conserved (See figure 4). The proteins encoded within the mating-pair-formation region, TrbA-TrbN, are similar to the proteins of the other IncP1- $\alpha$ ,  $\beta$ ,  $\gamma$  and  $\epsilon$  plasmids. In pEST4011, a member of the IncP1- $\delta$  subfamily most of the Trb region (the C-terminal half of TrbE and the TrbF to TrbN proteins) is missing, but the TrbA-TrbD proteins are similar to the pTetM proteins. A difference with the other IncP1 subfamilies is found in TrbK. The *trbK* gene is the only non essential gene in the *trb* operon, and normally encodes a small lipoprotein involved in entry exclusion [36]. The protein located between TrbJ and TrbL in the Neisserial conjugative plasmids is a small protein with a signal sequence followed by a cysteine residue for lipid anchoring, but has very little homology in its mature part to the known TrbK proteins. However, the genetic location of the protein, the small size and the presence of the lipoprotein signal sequence suggests that this protein also is an entry exclusion protein, and we have therefore also named it TrbK. Similar to representatives of the IncP1- $\beta$  and IncP1- $\gamma$  subfamilies, the TrbO

and TrbP proteins present in the IncP1- $\alpha$  and IncP1- $\epsilon$  families are not found in neisserial conjugative plasmids. The origin of replication (*oriV*) is in IncP1 plasmids generally located next to the replication initiation region. However in many plasmids insertions occur in this region, separating the *oriV* and the replication initiation region. Similar to the other IncP1 plasmids, the Rep region of the neisserial conjugative plasmids contains the *trfA* and *ssb* genes, which encode the *oriV* activator, and a single stranded DNA binding protein, respectively. No insertions have occurred between the Rep region and the *oriV*. The *oriV* region of IncP1 plasmids is approximately 400 bp long and consists of several direct repeats called iterons (17-mers) to which TrfA binds. Indeed the *trfA* gene is followed by 8 5'-GCATGTG-TAAATCCG-3' repeats in the next 400 bp. Comparison with the iterons of the other IncP1 subfamilies shows that the TrfA binding motif differs significantly from the other TrfA binding motifs (see figure 5). The inheritance and control region is relatively small compared to the other IncP1 plasmids, and contains only 6 genes. The IncC and KorB proteins are the ParA ATPase, and the ParB DNA binding protein homologues of the active partitioning system. KorB of the RK2 plasmid recognizes a 13 bp inverted repeat sequences (5'-TTTAGCCGCTAAA-3'), which was found 12 times on the RK2 plasmid [37]. This sequence is found 6 times on the neisserial conjugative plasmid, and 4 out of the 6 repeats were extended to 19 bp inverted repeats (5'-AATTTTATAGCCGCTAAATAA-3'). Remarkably the putative ParB site located in the genetic load region, shows homology over 52 bp (with 86% identity) with the putative ParB site between KorC and KleE. Remarkably even though the genetic load region around this ParB site seems a spot for insertions of gene sequences, the ParB binding site in the genetic load region was conserved in all three conjugative plasmids, suggesting an important function for this region. The control region further contains the accessory stability components KfrB, KfrC, and KleE, and the KorC regulator. This region does not contain a post-segregational killing system, but a remarkable combination of such systems was found in the genetic load region.

### Analysis of the genetic load region

The genetic load region of the conjugative plasmid contains 14 open reading frames, putatively located in three larger operons, and two single genes (*ngonSK11390* and *vapD*). The plasmids with a *tetM* determinant contain next to the *tetM* determinant a second inserted region which contains the *ngonSK11375* gene. The *ngonSK11375* gene encodes a protein with an unknown function. The first putative operon consists of the *ngonSK11395*, *ngonSK11400* and *ngonSK11405* genes and contains the *ngonSK11395* gene which

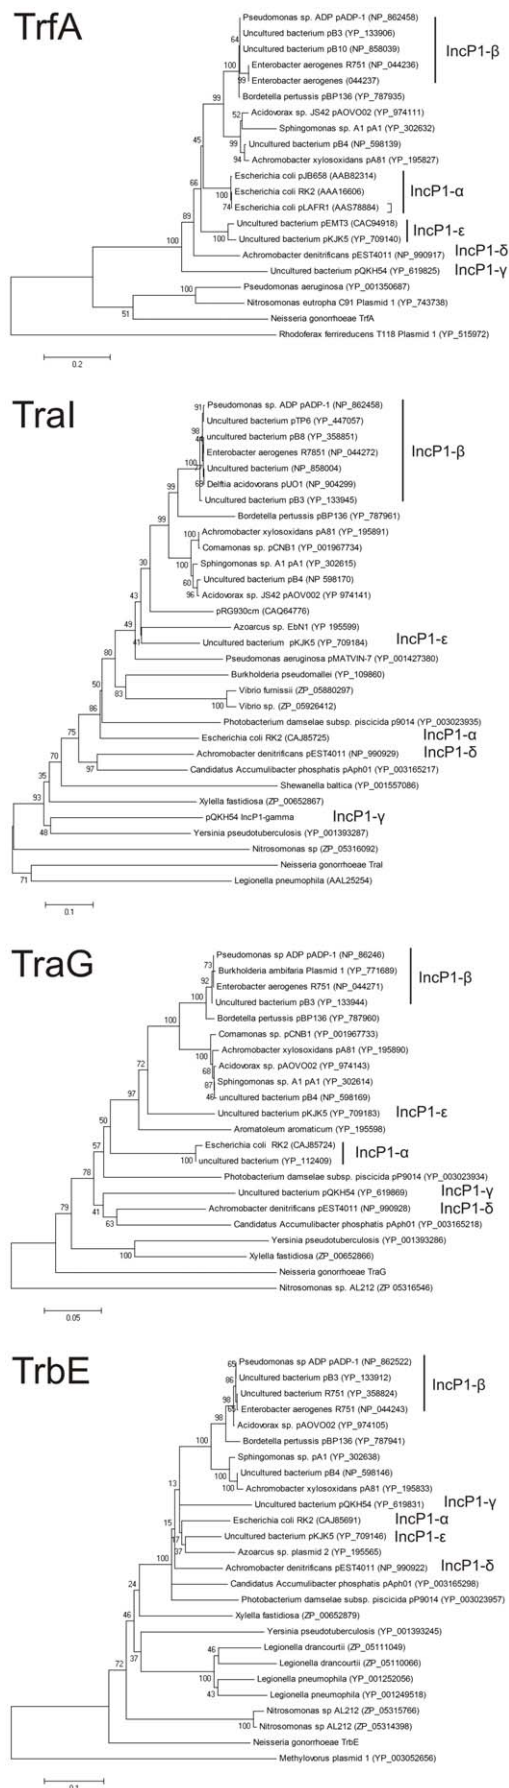

**Figure 3. Phylogenetic analysis of genes of different IncP1 plasmids.** The Tral (A), TrbE (B), TraG (C) and TrfA (D) proteins of the neisserial conjugative plasmids and of representative members of different IncP1 plasmid subfamilies ( $\alpha$ , RP4;  $\beta$ , pADP-1;  $\gamma$ , QKH54;  $\delta$ , pEST4011 and  $\epsilon$ , pKJK5) representative for different regions of the conjugative plasmids were used to create phylogenetic trees of the IncP1 plasmid family. (For details see materials and methods). doi:10.1371/journal.pone.0009962.g003

has homology to DNA modification methylases and two hypothetical proteins. This operon is separated from the operon including the *ngonSK11410*, *yegA* and *ngonSK11420* genes by a large 76 bp inverted repeat which functions putatively as a terminator. The *yegA* gene encodes a conserved protein with a Twin Arginine Translocation (TAT) signal sequence and a DUF88 domain, while the *ngonSK11410* and *ngonSK11420* genes encode hypothetical proteins. A homolog of the *yegA* gene is found within the Gonococcal Genetic Island, but also the function of this gene is unknown. The *zeta\_1*, *epsilon\_1*, *zeta\_2* and *epsilon\_2*, *marR* and *resA* genes also form a putative operon. In the conjugative plasmid the *zeta* and *epsilon* genes located at the positions of the *zeta\_2* and *epsilon\_3* genes in the *tetM* containing plasmids have obtained extended mutations without affecting the reading frame, and were named *zeta\_3* and *epsilon\_3*. The Zeta and Epsilon proteins encode components of a toxin-antitoxin system which was found in plasmid maintenance systems of Gram positive organisms which use a post segregation killing mechanism. Normally, plasmids encoding Zeta and Epsilon toxin-antitoxin proteins are part of a three-component system which also contains a regulator (*omega*). The *marR* gene also encodes a regulator of the MarR family, but this regulator comes from a different family than the *omega* regulators. The specific mechanism of the Zeta toxin is still unknown, but overexpression of the Zeta toxin of plasmid pSM19035 of *Streptococcus pyogenes* in *Bacillus subtilis* and *Escherichia coli* inhibited replication, transcription, and translation, and eventually lead to cell death [38]. This is the first Zeta/Epsilon toxin-antitoxin system identified in a Gram negative organism and the first Zeta/Epsilon toxin-antitoxin system in which two different copies of the toxin and of the antitoxin are located on one plasmid. Interestingly the genetic load region also contains the *vapD* gene that encodes the virulence associated protein D. VapD was shown to function as a toxin and is generally counteracted by an antitoxin protein called VapX. VapD/VapX systems have been reported in pathogens like *Rhodococcus equi* [39], *Dichelobacter nodosus* [40], *Xylella fastidiosa* [41], and *Haemophilus influenzae* [42]. It has been shown that expression of VapD enhances the invasion and survival within both human epithelial and endothelial cells [42]. Remarkably, no open reading frame encoding a VapX antitoxin could be identified within the sequence of the conjugative plasmid. A VapD/VapX toxin-antitoxin system was previously identified on pJD1, the cryptic plasmid which is present in 96% of the *N. gonorrhoea* strains [32]. It was tested whether the VapX antitoxin encoded on the cryptic plasmid pJD1 of *N. gonorrhoeae* might fulfill the role of antitoxin. Indeed when overnight conjugation experiments between *N. gonorrhoeae* containing the conjugative plasmid with the Dutch type *tetM* determinant and *Escherichia coli* were performed, tetracycline resistance was transferred much more efficiently to *E.coli* strains which expressed the VapX antitoxin of pJD1 ( $2 \cdot 10^{-2}$  tetracycline resistant clones per recipient) than to *E.coli* strains that did not contain the antitoxin ( $1 \cdot 10^{-8}$  tetracycline resistant clones per recipient). However, the conjugative plasmids could not be further maintained in *E.coli* for more than a few generations. The initial colonies did not grow in liquid medium, and could only be transferred once to new plates. This demonstrates that the conjugative plasmid can be conjugated to

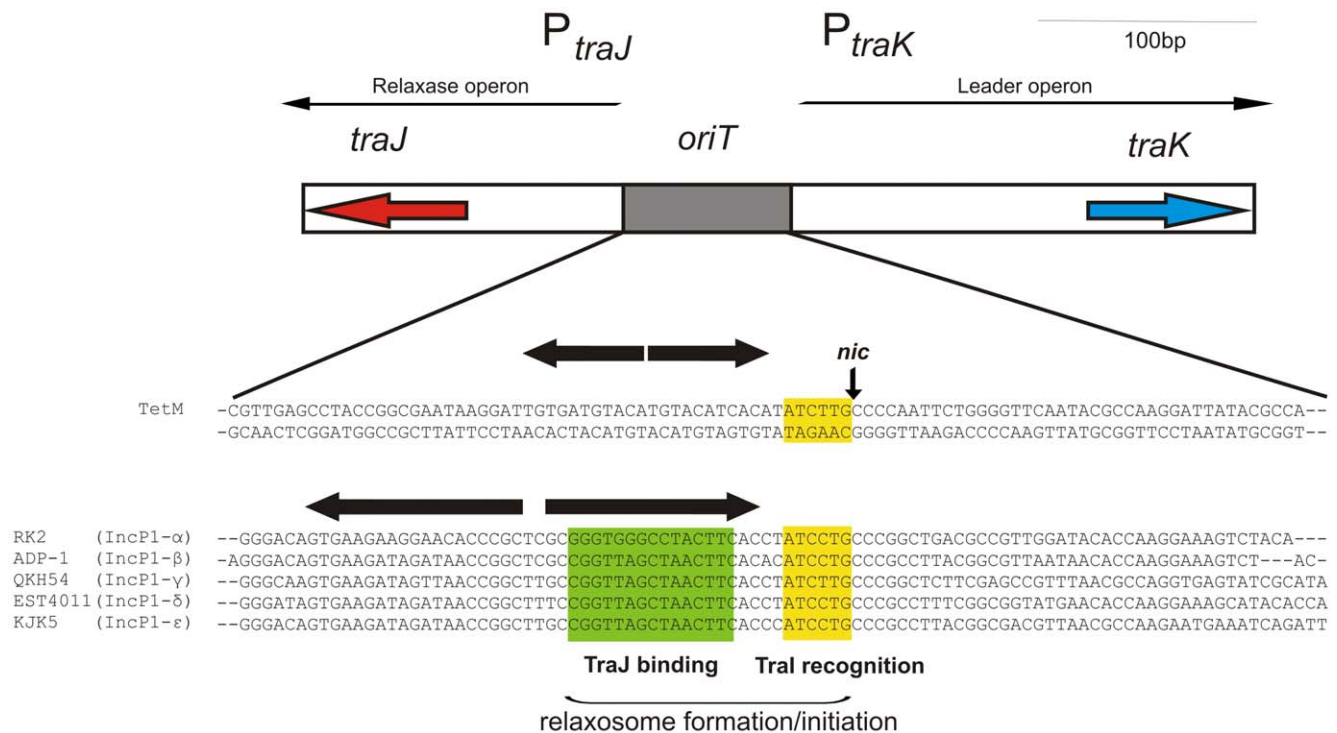

**Figure 4. Comparison of the *oriT* sequences of different members of the IncP1 subfamilies.** The common structure of the origin of transfer between the *traJ* and *traK* genes of the different IncP1 plasmids is shown. The *oriT* sequences of the indicated plasmids are depicted. In yellow and green the TraI recognition and TraJ binding sites are indicated. The large horizontal arrows indicate inverted repeat sequences adjacent to the *nic* site. The small vertical arrow indicates the (putative) *nic* sites of the relaxases. (The figure is modified from Pansgrau and Lanka (1996))  
doi:10.1371/journal.pone.0009962.g004

*E. coli*, but that the plasmid can not be further maintained. This suggests that the VapX antitoxin of the cryptic pJD1 plasmid might function as antitoxin of the VapD protein encoded on the conjugative plasmid, and might explain why the host range of the IncP1 conjugative plasmids of *N. gonorrhoeae*, is limited to *N. gonorrhoeae* and other neisserial species. This further suggests that the limitation of the host range could have resulted in a loss of the ability of the plasmid to be maintained in other species.

#### Comparison with the type IV DNA secretion system encoded within the gonococcal genetic island

To examine whether there was a relation between the occurrence of the GGI and the conjugative plasmids, the presence of the GGI was determined for all strains. Within 27 of the 42 strains the presence of the GGI was detected. Conjugative plasmids were present in 14 of the 15 strains which do not contain the GGI and in 17 of 27 strains that contain the GGI. Thus the conjugative plasmids are present in strains which contain the GGI and in strains that do not contain the GGI. In a final step the involvement of the type IV DNA secretion systems encoded in the GGI and the conjugative plasmid in the spread of chromosomal markers was studied. Strain with and without the GGI, and with and without the conjugative plasmid were grown in the presence of acceptor strains with and without the GGI. In all donors strains the erythromycin marker was inserted within the *recA* gene to ensure one directional transfer, while the recipient strains contained the chloramphenicol marker. As was observed previously [4], the transfer of a chromosomal marker was increased 500-fold in donor strains that contained the type IV DNA secretion systems encoded in the GGI, whereas no influence was observed of the presence of the conjugative plasmids (see

figure 6). This demonstrates that the type IV DNA secretion system encoded in the GGI is responsible for an increase in the spread of chromosomal markers, whereas no effects were observed for the conjugative plasmids.

#### Discussion

Conjugative plasmids of *Neisseria gonorrhoeae* were found in a large percentage of clinical isolates obtained from the Public Health Laboratory in Amsterdam (The Netherlands). These plasmids all contained a Dutch type backbone. Remarkably, within the clinical isolates tested, no plasmids with an American type backbone could be detected. Within these plasmids with a Dutch type backbone insertions of both Dutch and American *tetM* determinants were found. Next to the insertion of the different *tetM* determinants, the only difference between the strains with the *tetM* determinant (25.2 MDa plasmids) and strains without the *tetM* determinant (24.5 MDa plasmids) was the insertion of the *ngoSK11375* gene. Previously several differences have been observed between the 25.2 and 24.5 MDa plasmids, e.g. 25.2 MDa plasmids showed a broader host range [17] and some plasmids could only be mobilized by a 25.2 MDa conjugative plasmid [29]. It is difficult to explain these differences based on the presence of the *tetM* determinant or the *ngoSK11375* gene, and it might be possible that these results have been obtained with 25.2 MDa plasmids with an American type plasmid backbone.

The conjugative plasmids with the Dutch type backbone are members of a novel IncP1 subfamily which similarly to other IncP1 plasmids contains backbone modules for replication initiation, conjugative DNA-transfer, mating-pair-formation, stable plasmid inheritance and control. The genes encoded in the

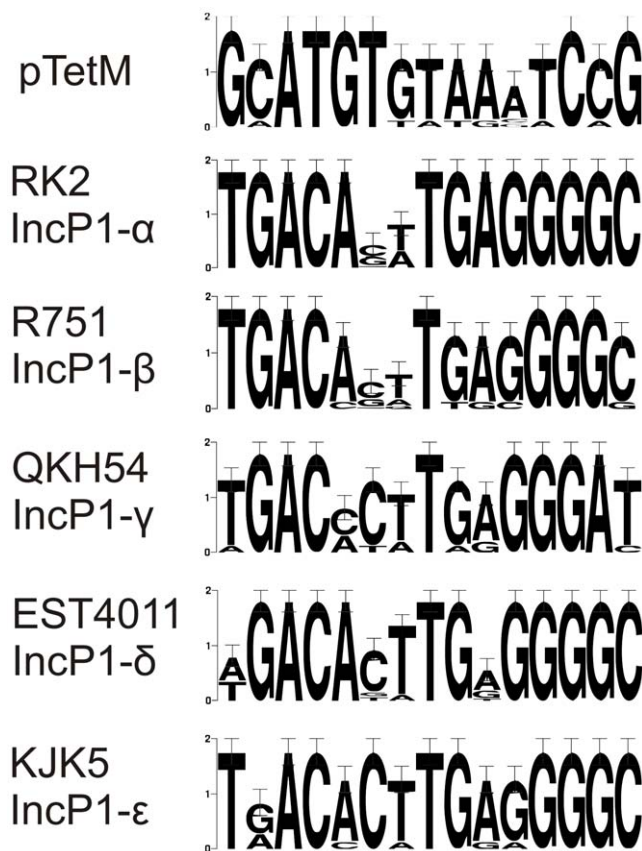

**Figure 5. Comparison of the *oriV* iterons of different members of the IncP1 subfamilies.** Weblogos were created to compare the 13 bp iterons of different members of the IncP1 subfamilies. The height of each base represents its conservation.  
doi:10.1371/journal.pone.0009962.g005

backbone modules of the Dutch type neisserial conjugative plasmids are phylogenetically divergent from the other IncP1 subfamilies, but since they belong to the broad host range IncP1 family, it is most likely that they have been acquired from other organisms. The limited host range compared to the normally broad host range of these plasmids might have allowed these plasmids to diverge from the other sub families.

The Dutch type neisserial conjugative plasmids contain a 'genetic load', module not found in other IncP1 plasmids. Remarkably three different putative toxin/antitoxin systems are located within this region. Two of the toxin/antitoxin systems belong to the Zeta/Epsilon toxin/antitoxin family. After insertion of the *tetM* determinant, several mutations occurred in one of the Zeta toxin/Epsilon antitoxin systems, generating mutated Zeta toxin and Epsilon antitoxin proteins. Zeta/Epsilon toxin/antitoxin systems have only been identified in Gram positive organisms [43,44,45] and always as a single copy. Although the structure of the Zeta/Epsilon toxin/antitoxin complex contained a phosphotransferase fold [46], the mechanism of the Zeta/Epsilon toxin/antitoxin system is still unknown. The functionality and the interactions between the different putative Zeta/Epsilon toxin/antitoxin systems encoded within the neisserial conjugative systems still need to be investigated.

The third toxin/antitoxin system identified on the neisserial conjugative plasmid belongs to the VapD family. The *vapD* gene has been previously identified in plasmids of *Rhodococcus equi* [39], *Actinobacillus actinomycetencomitans* [47], *Riemerella anatipestifer* [48] and

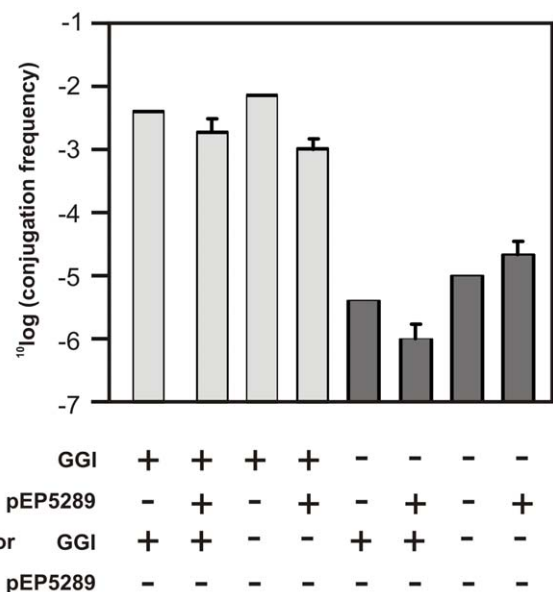

**Figure 6. Transfer of chromosomal markers via the Type IV DNA secretion system is not influenced by the presence of the conjugative plasmid.** Strains with the GGI (GGI+) or without the GGI (GGI-) and/or with (pEP5289+) or without (pEP5289-) the conjugative plasmid with the Dutch type *tetM* determinant and the Dutch type backbone were mixed, and grown at 37°C under 5% CO<sub>2</sub>. Donor strains contained the erythromycin marker in the *recA* gene, while recipient *Neisseria* strains contained the chloramphenicol marker. After 5 h of growth, serial dilutions were spread on selective media. Transfer frequencies were calculated as CFU of transconjugants per CFU of donor.  
doi:10.1371/journal.pone.0009962.g006

*N. gonorrhoeae* [32], and on the chromosomes of *Haemophilus influenzae* [49] and *Xylella fastidiosa* [50]. In *Dichelobacter nodosus*, *vapD* was found both on the chromosome and on a plasmid [51]. The *vapD* gene has been associated with virulence in several of these facultative intracellular microorganisms [40,42,49,52] but its precise role is still unknown. In *H. influenzae* the *vapX* gene was identified in the same operon as *vapD*. The VapX protein was shown to function as an antitoxin for VapD [42]. A homologue of the VapX protein was also identified next to the *vapD* gene on the cryptic pJD1 plasmid of *N. gonorrhoeae* [32]. Remarkably, the Dutch type conjugative plasmid of *N. gonorrhoeae* contains only the *vapD* gene. Since expression of the VapX antitoxin protein of pJD1 in *E. coli* acceptor cells strongly increased the transfer of the conjugative plasmid from *N. gonorrhoeae* to *E. coli*, we hypothesise that VapX protein located on pJD1 might function as an antitoxin for VapD on the conjugative plasmid. This arrangement most likely prevent the conjugative plasmid to transfer to other cells that do not contain the cryptic pJD1 plasmid, limiting the host range of these conjugative plasmids to the host range of the pJD1 cryptic plasmid. Currently no information is available about a possible role of the VapD proteins encoded on the pJD1 and the conjugative plasmid on conjugation.

Multiple toxin/antitoxin systems have been found in many genomes, and some genomes contain more than 50 putative toxin/antitoxin systems [53]. Many different functions have been proposed for the multiple chromosomal toxin/antitoxin systems [54]. Most plasmids however contain only a single toxin/antitoxin system, and the advantages of having three different toxin/antitoxin systems on one conjugative plasmid also remains unclear.

## Materials and Methods

### Bacterial strains and growth conditions

The genomic DNA of clinical isolates and gonococcal strains used in the study were obtained from the GG&GD Municipal Health Service, Public Health Laboratory in Amsterdam. The strains were characterized for their Maximal Inhibitory Concentrations for ciprofloxacin, tetracycline and penicillin as described in [55]. *N. gonorrhoeae* was grown on GCB (Difco) plates containing Kellogg's supplements [56] or in GCBL liquid medium (GCBL) containing 0.042% NaHCO<sub>3</sub> [57] and Kellogg's supplements. For *N. gonorrhoeae*, tetracycline was used at 5 µg/ml, chloramphenicol was used at 10 µg/ml and erythromycin at 10 µg/ml. For *E. coli*, tetracycline was used at 5 µg/ml, erythromycin was used at 500 µg/ml and ampicillin at 100 µg/ml. For further *N. gonorrhoeae* and *E. coli* strains used in this study see table 3.

### Isolation of chromosomal DNA

Bacterial isolates were typically harvested for DNA isolation from pure culture plates, taking up to five morphologically identical and single colonies depending on the size of the colonies [55]. If no separate colonies grew on the pure culture plate, *N. gonorrhoeae* colonies were harvested from a tertiary plate. Colonies were lysed in 100 µl of 5 M guanidine thiocyanate buffer (BioMérieux, the Netherlands) containing 0.04 mg/ml glycogen (Roche Diagnostics, the Netherlands), and stored at 4°C until DNA isolation was performed. Chromosomal DNA was extracted from lysates by addition of an equal volume (700 µl) chilled (−20°C) isopropanol, followed by centrifugation for 20 minutes at 14,000 rpm. The pellet was subsequently washed twice with 500 µl 70% ethanol. Precipitated total DNA was dissolved in 50 µl 10 mM Tris/HCl (pH 8.0) and diluted 500 times in this buffer for most PCR reactions.

Alternatively, chromosomal DNA for PCR analysis was obtained by rapid cell lysis. Shortly, a smear of cells from overnight growth on GCB plates was resuspended in 25 µl of lysis solution (50 mM Tris/HCl pH 8.0, 20 mM EDTA, 50 mM

NaCl). For each 25 µl PCR reaction 3 µl of the lysate was used. All sequencing reactions of PCR products were performed by Service XS (Leiden, the Netherlands).

### Determination of the *tetM* determinant and the presence of the Gonococcal Genetic Island

The presence of the *tetM* determinant was detected via PCR analysis as previously described. Shortly, either primers Tet\_4F (universal forward) and Tet\_AR (American reverse), or Tet\_4F and Tet\_DR (Dutch reverse) were used to amplify the *tetM* determinants, giving PCR fragments of 778 bp and 443 bp for the American and Dutch type determinants, respectively [31]. (For primers used in this study see table 4). Alternatively, primers RM4 and G1 were used to amplify the *tetM* determinant giving PCR fragments of 1600 and 700 bp for the American and Dutch type determinants, respectively [30]. The presence of the Gonococcal Genetic Island was detected via PCR analysis using the primers GGI-21F and GGI-22R (369 bp) and primers GGI-27F and GGI-28R (453 bp), amplifying regions of *traK* and *topB*, respectively. PCR products were analyzed by electrophoresis in 1% w/v agarose and visualized after ethidium bromide staining.

### Plasmid DNA isolation from *N. gonorrhoeae*

*Neisseria gonorrhoeae* clinical isolates 5050, 5233 and 5289 were chosen for isolation of their conjugative plasmids. The isolation was performed by a cleared lysate method followed by double acetate precipitation adapted from the Genome Sequencing Center, Washington University for *N. gonorrhoeae* as follows. Non-piliated colonies of *Neisseria gonorrhoeae* were selected and transferred into 3 ml of GCBL medium GCBL liquid medium (GCBL) containing 0.042% NaHCO<sub>3</sub> and Kellogg's supplements with a final concentration of tetracycline (5 µg/ml) for plasmids containing the *tetM* determinant. After incubating for 3 hours at 37°C under 5% CO<sub>2</sub> in a shaking incubator at 200 rpm, the culture was diluted to an OD<sub>600</sub> of 0.2 in 6 tubes of 3 ml of GCBL containing 0.042% NaHCO<sub>3</sub> and Kellogg's supplements and growth was

**Table 3.** Strains used in this study.

| strain                 | Genotype                                                                                                                                     | source or references |
|------------------------|----------------------------------------------------------------------------------------------------------------------------------------------|----------------------|
| <i>E. coli</i> TOP10F- | F- mcrA Δ(mrr-hsdRMS-mcrBC) φ80lacZΔM15 ΔlacX74 nupG recA1 araD139 Δ(ara-leu)7697 galE15 galK16 rpsL(Str <sup>R</sup> ) endA1 λ <sup>−</sup> | Invitrogen           |
| MS11A                  | <i>N. gonorrhoeae</i> strain                                                                                                                 | [62]                 |
| ND500                  | MS11AΔGGI                                                                                                                                    | [4]                  |
| 5289                   | low passage clinical isolate of <i>Neisseria gonorrhoeae</i>                                                                                 | GGD                  |
| 5050                   | low passage clinical isolate of <i>Neisseria gonorrhoeae</i>                                                                                 | GGD                  |
| 4393                   | low passage clinical isolate of <i>Neisseria gonorrhoeae</i>                                                                                 | GGD                  |
| 4703                   | low passage clinical isolate of <i>Neisseria gonorrhoeae</i>                                                                                 | GGD                  |
| 5371                   | low passage clinical isolate of <i>Neisseria gonorrhoeae</i>                                                                                 | GGD                  |
| 5291                   | low passage clinical isolate of <i>Neisseria gonorrhoeae</i>                                                                                 | GGD                  |
| 5233                   | low passage clinical isolate of <i>Neisseria gonorrhoeae</i>                                                                                 | GGD                  |
| EP006                  | MS11A ΔrecA::Erm                                                                                                                             | This study           |
| EP030                  | ND500 ΔrecA::Erm                                                                                                                             | This study           |
| EP015                  | MS11A lctP::Cm::aspC                                                                                                                         | This study           |
| EP029                  | ND500 lctP::Cm::aspC                                                                                                                         | This study           |
| EP006/5289             | ΔrecA::Erm pTetM Dutch type                                                                                                                  | This study           |
| EP030/5289             | ΔrecA::Erm pTetM American type                                                                                                               | This study           |

doi:10.1371/journal.pone.0009962.t003

**Table 4.** Plasmids used in this study.

| Plasmid | properties                                                                                                                                       | source or references |
|---------|--------------------------------------------------------------------------------------------------------------------------------------------------|----------------------|
| pTrc99A | <i>E. coli</i> expression vector (AmpR)                                                                                                          | [63]                 |
| pEP086  | derivative of pTrc99A with mutated <i>trc</i> promoter                                                                                           | This study           |
| pEP087  | derivative of pEP086 containing <i>vapX</i>                                                                                                      | This study           |
| pIND1   | <i>E. coli</i> insertion duplication mutagenesis vector for <i>N. gonorrhoeae</i> ; contains <i>ermC</i>                                         | [61]                 |
| pKH35   | <i>E. coli</i> complementation vector for <i>N. gonorrhoeae</i> (CmR)                                                                            | [4]                  |
| pEP013  | derivative of pIND1 carrying fragment of <i>recA</i>                                                                                             | This study           |
| pEP5050 | <i>N. gonorrhoeae</i> conjugative plasmid with American type <i>tetM</i> determinant and Dutch type backbone isolated from clinical isolate 5050 | This study           |
| pEP5233 | <i>N. gonorrhoeae</i> conjugative plasmid with Dutch type backbone isolated from clinical isolate 5233                                           | This study           |
| pEP5289 | <i>N. gonorrhoeae</i> conjugative plasmid with Dutch type <i>tetM</i> determinant and Dutch type backbone isolated from clinical isolate 5289    | This study           |

doi:10.1371/journal.pone.0009962.t004

continued for 4 h. Then, all 18 ml of the pre-culture was added to 1 liter of GCBL containing 0.042%  $\text{NaHCO}_3$  and Kellogg's supplements and incubated overnight at 37°C under 5%  $\text{CO}_2$  in a shaking incubator at 200 rpm. After harvesting the cells by centrifugation at 8,000 rpm in a JLA-16.25 rotor for 15 minutes, the cells were resuspended in 40 ml of 10 mM of EDTA, pH 8.0. After mixing gently, the solution was incubated at room temperature for 5 minutes. 80 ml of alkaline lysis solution (0.2 N NaOH and 1% SDS) was added and after gentle swirling until the solution became homogenous, it was incubated for 5 minutes at room temperature. Then, 60 ml cold, 3 M KOAc pH 5.5 was added and again mixed gently by swirling the bottle several times. Consecutively, the bottle was frozen at -20°C overnight. After thawing, the lysate was cleared from precipitated SDS, proteins, membranes, and chromosomal DNA by centrifugation at 10,000 rpm in a JLA-16.25 rotor for 15 minutes. Prior to re-centrifugation, the cleared supernatant was filtered to remove any floating material. Then, remaining insoluble material was removed by an additional centrifugation at 10,000 rpm in a JLA-16.25 rotor for 15 minutes. To the supernatant an equal volume of isopropanol was added and mixed by swirling. After centrifugation at 5,000 rpm in a JLA-16.25 rotor for 15 minutes, the supernatant was decanted and the pellet drained. The second acetate precipitation step was performed after gently dissolving the DNA pellet in 18 ml of 10:50 TE, then 9 ml of 7.5 M KOAc (without pH adjustment) was added, and after mixing, the bottles were frozen and stored overnight at -80°C. After the solution was thawed and centrifuged at 6,000 rpm in a SS-34 rotor for 10 minutes. Dnase-free Rnase A was added to a final concentration of 100  $\mu\text{g}/\text{ml}$  to the supernatant followed by incubation at 37°C for 1 hour. Then, 30 ml of cold 95% ethanol was added, and after mixing by inverting, the tubes were incubated at 4°C for 15 minutes. After centrifugation for 30 minutes at 3,000 rpm in a SS-34 rotor the pellet was washed with 30 ml of 70% ethanol and dried. Each pellet was resuspended in 1 ml of 10 mM Tris pH 8.0 and 0.1 mM EDTA and incubated at 37°C for 2 hours to ensure all the high molecular weight DNA was dissolved completely. The DNA was further stored at 4°C. Approximately 1.2  $\mu\text{g}$  of plasmid DNA was obtained from 1 liter of *N. gonorrhoeae*. 15  $\mu\text{g}$  of plasmid DNA obtained from 13 liters of *N. gonorrhoeae* clinical isolate 5289 was sent to the MacroGen Corporation (Seoul, South Korea) to obtain the plasmid sequence via shotgun cloning and sequencing.

### Southern blot and restriction analysis

Whole plasmid DNA was transferred to nitrocellulose membranes by the method of Southern [58] followed by the hybridization of DIG-labelled *tetM*. The *tetM*-specific probe (448 bp) was PCR-amplified using primers Tet\_4F and Tet\_DR with purified plasmid as a template. The Dutch-type plasmid has been verified by the restriction analysis as follows. 10  $\mu\text{g}$  of the purified Dutch type plasmid was digested for 14 h with *Bgl*I (0.1 U/ $\mu\text{g}$ ) (Fermentas) followed by electrophoresis in 1% w/v agarose and visualized after ethidium bromide staining.

### DNA sequence analysis and annotations

The nucleotide sequence of the pEP5289 plasmid of *Neisseria gonorrhoeae* clinical isolate 5289 was determined via the shotgun method by MacroGen Inc. (Seoul), resulting in 7 contigs with at least 6 times coverage. Gap closure of the sequences was achieved by PCR amplification with the following primer combinations: trfA\_F and ssb\_R, trbB\_F and trbC\_R, korC\_R and kleE\_1F, 11390\_F and 11395\_R, trbN\_F and res\_R, res\_F and zetaR. The analysis of predicted open reading frames was performed manually. The predicted open reading frames and their products were analyzed using the BLAST algorithm [59] and manually annotated. To determine the region in which the *tetM* determinant had putatively inserted into the 24.5 MDa conjugative plasmid (pEP5233) PCR reactions were performed with the following primers combinations: 11375\_F and 11390\_dw\_R, 11375\_F and 11390\_R, Tet\_up\_1F and 11390\_dw\_R, Tet\_up\_1F and 11390\_R, Tet\_up\_4F and 11390\_dw\_R, Tet\_up\_4F and 11390\_R, Tet\_up\_6F and 11390\_dw\_R, Tet\_up\_6F and 11390\_R. The resulting PCR products were sent for sequencing either directly or after cloning in pGemT-Easy (Promega). To compare the plasmid core of the Dutch (pEP5289) and American (pEP5050) *tetM* type plasmids, with the 24.5 MDa conjugative plasmid (pEP5233) PCR reactions were performed with the primers used for the gap closure, and the additional PCR primer pairs: traO\_R and traN\_F for the *traN-traO* region, traI\_R and traI\_F for the *traI* gene, trbB\_F and trbB\_R for the *trbB* gene, trbI\_F and trbI\_R for the *trbI*, kleE\_2F and trfA\_R for the replication region, trbC\_F and trbE\_R for *trb* operon and traD\_F and traE\_R for *tra* operon. The templates for PCR reactions were the Dutch (pEP5289) and American (pEP5050) *tetM* type plasmids and the 24.5MDa conjugative plasmid (pEP5233). All PCR products were purified by gel elution (Sigma) and sequenced. The sequence of the conjugative plasmid with the Dutch type *tetM* determinant

**Table 5.** Primers used in this study.

| Oligo | Oligo name                                                   |
|-------|--------------------------------------------------------------|
| 234   | Tet_4F 5'-CTCGAACAAGAGGAAAGC-3'                              |
| 235   | Tet_AR 5'-GCATTCCACTTCCCAAC-3'                               |
| 236   | Tet_DR 5'-TGCAGCAGAGGGAGG-3'                                 |
| 298   | Tet_1R 5'-CCACTGTTATATAAAGCTTCTGTTAAGG-3'                    |
| 299   | Tet_7F 5'-TTGCCAGCCCGTCGTCCAATAGTCGGAT-3'                    |
| 304   | Tet_up_3F 5'-ATAAAGTGTCAATTGATAGTGGGAAC-3'                   |
| 305   | Tet_dw_1R 5'-CCATATTATATAACAACATAAAATACACTA-AGTT-3'          |
| 306   | Tet_8R 5'-ACCTTCTGTTTGATTACAAT-3'                            |
| 307   | Tet_9F 5'-TACAGTCATTATATGGAGAGACCGT-3'                       |
| 309   | Tet_3F 5'-GGAAAAATGGGGATTCCCACT-3'                           |
| 310   | Tet_6R 5'-TACAATCCTTGTTCACAGCCAT-3'                          |
| 324   | Tet_2R 5'-TGTCCTGGCGTGTCTATGAT-3'                            |
| 393   | trbC_R 5'-GTAACGGACTGGCGGAGATT-3'                            |
| 394   | trbN_F 5'-CTTGCCGGTAGGCAAGGAA-3'                             |
| 395   | ssb_R 5'-AGGCCAAGAACGCCGTCAGG-3'                             |
| 396   | trbB_F 5'-AGAGGAACAGGGAGGCAATT-3'                            |
| 397   | korC_R 5'-ATGCCCTATTGGGTTTATTG-3'                            |
| 398   | trfA_F 5'-TAATCTACAAGCTGCATCCA-3'                            |
| 399   | kleE_1F 5'-CCCATTACGATACCGAACGTCAAG-3'                       |
| 400   | 11395_R 5'-GTTACATGGAAGCCGCCGTAAGAC-3'                       |
| 401   | traO_R 5'-AGCAGAAAAACAAGAGTCTGG-3'                           |
| 402   | traN_F 5'-ACGGTTCAGCCTTGATTGTG-3'                            |
| 403   | tral_R 5'-TATCATCTGATGGTATCCCTTGCG-3'                        |
| 404   | tral_F 5'-ACCGATCTGATTTTCATCCTT-3'                           |
| 405   | trbB_F 5'-AGCGTGATTTGGGAAATGAG-3'                            |
| 406   | trbB_R 5'-GGCATTGTTTGCATGCAGTG-3'                            |
| 407   | trbI_F 5'-TGCACTGGTGGCAGCACTA-3'                             |
| 408   | trbI_R 5'-TGGTTGTAAACGCGCTCCAC-3'                            |
| 409   | Tet_10R 5'-CCATAAAGTCAATTTTGAAC-3'                           |
| 410   | 11390_F 5'-CGCCCAATCTTGCTGTATT-3'                            |
| 412   | Zeta_F 5'-TTCATCCCTTGGCTTCAGC-3'                             |
| 414   | Res_R 5'-AAGAGCAGAATGTGGCCGCA-3'                             |
| 415   | 11375_F 5'-CTTGGACGGTTTTCATGTT-3'                            |
| 416   | Tet_up_1F 5'-CCAGTTGTCTTTGTTCAGT-3'                          |
| 417   | Tet_up_4F 5'-GGAACAAATAATTAGATGTCCT-3'                       |
| 418   | Tet_up_6F 5'-CAGTTTAAGAATACCTTTATCATGTGATT-3'                |
| 419   | 11390_R 5'-AGCCGCTGCGAGATGTAGG-3'                            |
| 420   | 11390_dw_R 5'-ACACCCCTGTCCAAGCGAAATTT-3'                     |
| 421   | Tet_up_5F 5'-TTTTTAGGAGGGCTTAGTTTTGTACC-3'                   |
| 422   | Res_F 5'-GATCTTCATACACCGTTTCG-3'                             |
| 423   | Zeta_R 5'-GGGCAACACTGCAACGCAAA-3'                            |
| 433   | Zeta_F 5'-CCAGCATTTCTACCCGTAC-3'                             |
| 434   | Tet_up_2R 5'-AGTGGCGCTGGATACGCCGTAG-3'                       |
| 435   | RM4 5'-CCAATCCTTTCTGGGCT-3'                                  |
| 436   | G1 5'-ATCACTCACAGTTAATTTT-3'                                 |
| 474   | 11355_F 5'-ATGACATCATCGAACTGTGATAAAT-3'                      |
| 475   | pTrc99a mut -10 F 5'-TTCCTGTGTGGAATTGTGAGCGGATAAC-AATTC - 3' |
| 476   | pTrc99a mut -10 R 5'-CGAGCCGGATGATTAATTGTCAACA - 3'          |

**Table 5.** Cont.

| Oligo   | Oligo name                                          |
|---------|-----------------------------------------------------|
| 477     | kleE_2F 5'-CCTCCGTCGATATAGTTTG-3'                   |
| 478     | trfA_R 5'-GCCAGCCGTATTGAATACAG-3'                   |
| 79      | trbC_F 5'-CGCACAGCATTACCTTCTC-3'                    |
| 480     | trbE_R 5'-GGCCGTTCAATTCCATAACC-3'                   |
| 481     | traD_F 5'-TCTGCGATCACTTCGATGTC-3'                   |
| 482     | traE_R 5'-TGTGCGATCCGGAAGATTAC-3'                   |
| 503     | vapX_F 5'-TGCGCCATGGAAACCACTATCCCCACCG-GTTC - 3'    |
| 504     | vapX_R 5'-GCGCTCTAGATTAGGCAGCCTTTGGGTCT-TGAACG - 3' |
| GGI-21F | traK_F 5'-GGGGGTACCACGGAACCTGAGCAGAATCG- 3'         |
| GGI-22R | traK_R 5'-AAAGGATCCGTAGTCCACGCATCATAGA- 3'          |
| GGI-27F | topB_F 5'-CGCGGATCCCTGGCCTTGGTCGGAATAAT- 3'         |
| GGI-28R | topB_R 5'-AAAGGTACCTGGCGTAATACTGACGGAT- 3'          |
| 148     | recA_F 5'-GAGCTCCGTGCGCCTTTGTCGATG - 3'             |
| 149     | recA_R 5'-GGTACCCTTCGCTCTGCGTCCCTTC - 3'            |

doi:10.1371/journal.pone.0009962.t005

(pEP5289), and of the genetic load regions of the conjugative (pEP5233) and the plasmid with the American type *telM* determinant (pEP5050) were deposited under genbank numbers GU479464, GU479465 and GU479466.

### Phylogenetic analysis

To generate a phylogenetic tree, homologues of the TraI, TrbE, TraG and TrfA proteins of representative members of the different IncP1 plasmid subfamilies ( $\alpha$ , RP4;  $\beta$ , pADP-1;  $\gamma$ , QKH54;  $\delta$ , pEST4011 and  $\epsilon$ , pKJK5) and the Dutch type plasmids were obtained using BLAST [59] against the NCBI non-redundant protein database using expect values lower than 1E-10 for TraI and TrfA, and expect values lower than 1E-100 for TraG and TrbE. Duplicates and incomplete proteins were removed, and multiple alignments were constructed with the CLUSTALX program [60] and an initial phylogenetic tree was created using the MEGA 4 package. Sequences of the IncP1 plasmid and of the Dutch type plasmids grouped in a small section of the phylogenetic tree. The sequences of this small section were selected, realigned with CLUSTALX, and Neighbor-joining trees based on the distance parameter were constructed using the MEGA 4 package. Bootstrap values from 1000 replicates were also acquired.

### Construction of strains and plasmids used in this study

Gram-negative strains were constructed as follows. Strains EP006 and EP030 were generated via the insertion-duplication method as described previously [61]. Briefly, an internal fragment of the *recA* gene was cloned in pIND1 plasmid [61] followed by transformation to strain MS11A and its derivative ND500 (MS11/ $\Delta$ GGI), respectively. Conjugation of the tetracycline plasmid pTetM from non-piliated strain 5289 to pilated strains EP006 and EP030 resulted in pilated and tetracycline resistant strains EP006/5289 and EP030/5289, respectively. Strains EP015 and EP029 were constructed by transformation of strain MS11A and its derivative ND500 ( $\Delta$ GGI) with plasmid pKH35 [4]. VapX was cloned using introduced *NcoI* and *XbaI* sites behind the mutated *trc* promoter of pEP086 after PCR amplification of the *vapX* gene of the pJD1 plasmid contained in strain 5289 using primers 503 (vapX\_F) and

504 (vapX\_R). pEP086 is derived from vector pTrc99A. In pEP086, expression was reduced after mutagenesis of the promoter by PCR amplification of plasmid pTrc99A with primers 475 (pTrc99A mut-10\_F) and 476 (pTrc99A mut-10\_R). Plasmids used and created in this study are listed in table 5.

### Conjugation to *Escherichia coli*

Non-piliated gonococcal donor strain 5289 was streaked from O/N grown plates and suspended in 3 ml of GCBL (Difco) medium supplemented with Kellogg's supplements and 0.042% NaHCO<sub>3</sub>. The culture was diluted till an OD<sub>600</sub> of 0.2 and was grown with shaking for 4 h at 37°C in a 5% CO<sub>2</sub> atmosphere. The recipient strain *Escherichia coli* TOP10 was diluted 50-fold from an overnight culture and was grown for 3 h. Equal portions of donor and recipient were mixed, centrifuged and pellets were resuspended in 100 µl of GCBL. The suspensions were placed on GCB plates in the presence or absence of 0.5 mM IPTG. Plates were incubated at 37°C under 5% CO<sub>2</sub> overnight. After the incubation cells were suspended in 100 µl of LB medium, and mating was interrupted by vigorous vortexing for 5 s and serial dilutions were plated on selective media (5 µg/ml of tetracycline for transconjugants selection). The mating efficiency was calculated as a CFU of transconjugants per CFU of recipient.

### *Neisseria gonorrhoeae* conjugation assay

Donors and recipients from plates inoculated overnight were suspended in 3 ml of GCBL (Difco) medium supplemented with Kellogg's supplements and 0.042% NaHCO<sub>3</sub>. Cultures were diluted till an OD<sub>600</sub> of 0.2 and were grown for 4 h at 37°C with 5% CO<sub>2</sub>. Equal portions of donor and recipient were mixed, centrifuged and pellets were resuspended in 100 µl of GCBL. The suspensions were placed on GCB plates supplemented with Kellogg's supplements. Plates were incubated at 37°C under 5% CO<sub>2</sub> for 24 hours. After the incubation cells were suspended in 1 ml of GCBL (Difco) medium supplemented with Kellogg's supplements and 0.042% NaHCO<sub>3</sub> [57] and serial dilutions were plated on selective media. Recipient *Neisseria gonorrhoeae* strains contained the chloramphenicol marker while donors were tetracycline resistance. All donors had the erythromycin insertion within the *recA* gene to ensure one directional transfer. Transfer frequencies were calculated as CFU of transconjugants per CFU of donor.

## References

- McGee ZA, Johnson AP, Taylor-Robinson D (1981) Pathogenic mechanisms of *Neisseria gonorrhoeae*: observations on damage to human fallopian tubes in organ culture by gonococci of colony type 1 or type 4. *J Infect Dis* 143: 413–422.
- Livermore DM (2009) Has the era of untreatable infections arrived? *J Antimicrob Chemother* 64 Suppl 1: i29–36.
- Smith JM, Smith NH, O'Rourke M, Spratt BG (1993) How clonal are bacteria? *Proc Natl Acad Sci U S A* 90: 4384–4388.
- Hamilton HL, Dominguez NM, Schwartz KJ, Hackett KT, Dillard JP (2005) *Neisseria gonorrhoeae* secretes chromosomal DNA via a novel type IV secretion system. *Mol Microbiol* 55: 1704–1721.
- Morse SA, Johnson SR, Biddle JW, Roberts MC (1986) High-level tetracycline resistance in *Neisseria gonorrhoeae* is result of acquisition of streptococcal tetM determinant. *Antimicrob Agents Chemother* 30: 664–670.
- Mayer LW, Holmes KK, Falkow S (1974) Characterization of plasmid deoxyribonucleic acid from *Neisseria gonorrhoeae*. *Infect Immun* 10: 712–717.
- Stiffler PW, Lerner SA, Bohnhoff M, Morello JA (1975) Plasmid deoxyribonucleic acid in clinical isolates of *Neisseria gonorrhoeae*. *J Bacteriol* 122: 1293–1300.
- Roberts M, Piot P, Falkow S (1979) The ecology of gonococcal plasmids. *J Gen Microbiol* 114: 491–494.
- Genco CA, Knapp JS, Clark VL (1984) Conjugation of plasmids of *Neisseria gonorrhoeae* to other *Neisseria* species: potential reservoirs for the beta-lactamase plasmid. *J Infect Dis* 150: 397–401.
- Knapp JS, Zenilman JM, Biddle JW, Perkins GH, DeWitt WE, et al. (1987) Frequency and distribution in the United States of strains of *Neisseria gonorrhoeae* with plasmid-mediated, high-level resistance to tetracycline. *J Infect Dis* 155: 819–822.
- Burdett V, Inamine J, Rajagopalan S (1982) Heterogeneity of tetracycline resistance determinants in *Streptococcus*. *J Bacteriol* 149: 995–1004.
- Roberts MC, Koutsky LA, Holmes KK, LeBlanc DJ, Kenny GE (1985) Tetracycline-resistant *Mycoplasma hominis* strains contain streptococcal tetM sequences. *Antimicrob Agents Chemother* 28: 141–143.
- Roberts MC, Kenny GE (1986) TetM tetracycline-resistant determinants in *Ureaplasma urealyticum*. *Pediatr Infect Dis* 5: S338–340.
- Fletcher HM, Marri L, Danco-Moore L (1989) Transposon-916-like elements in clinical isolates of *Enterococcus faecium*. *J Gen Microbiol* 135: 3067–3077.
- Roberts MC, Hillier SL, Hale J, Holmes KK, Kenny GE (1986) Tetracycline resistance and tetM in pathogenic urogenital bacteria. *Antimicrob Agents Chemother* 30: 810–812.
- Swartley JS, McAllister CF, Hajjeh RA, Heinrich DW, Stephens DS (1993) Deletions of Tn916-like transposons are implicated in tetM-mediated resistance in pathogenic *Neisseria*. *Mol Microbiol* 10: 299–310.
- Roberts MC, Knapp JS (1988) Host range of the conjugative 25.2-megadalton tetracycline resistance plasmid from *Neisseria gonorrhoeae* and related species. *Antimicrob Agents Chemother* 32: 488–491.

### Transformation assay

Donors and recipients from plates inoculated overnight were suspended in 3 ml of GCBL (Difco) medium supplemented with Kellogg's supplements and 0.042% NaHCO<sub>3</sub>. Cultures were grown for 2.5 h at 37°C with 5% CO<sub>2</sub>. 1 ml of both donor and recipient cultures were centrifuged and pellets were resuspended in 3 ml of GCBL. 0.5 ml of donor and 0.5 ml of recipient were inoculated in 3 ml of GCBL for 5 h at 37°C with 5% CO<sub>2</sub> (both shaking and non shaking conditions). Serial dilutions were spread on selective media. Recipient *Neisseria* strains contained the chloramphenicol marker while donors were tetracycline resistance. All donors had the erythromycin marker inserted within the *recA* gene to ensure one directional transfer. Transfer frequencies were calculated as CFU of transconjugants per CFU of donor.

### Additional information

Weblogs were created at <http://weblogo.berkeley.edu/>.

### Supporting Information

**Figure S1** Alignment of the region between the zeta\_1 and ngoSK11390 of the genetic load region of the neisserial conjugative plasmids. Depicted are the conjugative plasmid with the American type tetM determinant (A), the Dutch tetM determinant (D) and the plasmid without a tetM determinant (C). The different genes are indicated with different colors. Arrows above the genes indicate the orientation of the genes.  
Found at: doi:10.1371/journal.pone.0009962.s001 (0.23 MB DOC)

### Acknowledgments

We especially thank Arnold J.M. Driessen and the department of molecular microbiology, in which department these experiments have been performed and the Groningen Biomolecular Sciences and Biotechnology Institute for continuous support. We thank Sylvia M. Bruisten from the Public health laboratory of GGD Amsterdam for providing *Neisseria gonorrhoeae* strains and DNA isolates with antibiograms from clinical samples. We thank Samta Jain, Maria Zweig and Eva-Maria Heller for discussions and critical reading of the manuscript.

### Author Contributions

Conceived and designed the experiments: EP CvdD. Performed the experiments: EP. Analyzed the data: EP CvdD. Contributed reagents/materials/analysis tools: CvdD. Wrote the paper: EP CvdD.

18. Gascoyne DM, Heritage J, Hawkey PM, Turner A, van Klingeren B (1991) Molecular evolution of tetracycline-resistance plasmids carrying TetM found in *Neisseria gonorrhoeae* from different countries. *J Antimicrob Chemother* 28: 173–183.
19. Ison CA, Tekki N, Gill MJ (1993) Detection of the tetM determinant in *Neisseria gonorrhoeae*. *Sex Transm Dis* 20: 329–333.
20. Chalkley IJ, Janse van Rensburg MN, Matthee PC, Ison CA, Botha PL (1997) Plasmid analysis of *Neisseria gonorrhoeae* isolates and dissemination of tetM genes in southern Africa 1993–1995. *J Antimicrob Chemother* 40: 817–822.
21. Johnson SR, Morse SA (1991) The relationship between the 39 kb tetracycline-resistance plasmid and the 36 kb conjugative plasmid of *Neisseria gonorrhoeae*. *J Antimicrob Chemother* 27: 864–867.
22. Gascoyne DM, Heritage J, Hawkey PM (1990) The 25.2 Mda tetracycline-resistance plasmid is not derived from the 24.5 Mda conjugative plasmid of *Neisseria gonorrhoeae*. *J Antimicrob Chemother* 25: 39–47.
23. Gascoyne-Binzi DM, Heritage J, Hawkey PM (1993) Nucleotide sequences of the tet(M) genes from the American and Dutch type tetracycline resistance plasmids of *Neisseria gonorrhoeae*. *J Antimicrob Chemother* 32: 667–676.
24. Knapp JS, Johnson SR, Zenilman JM, Roberts MC, Morse SA (1988) High-level tetracycline resistance resulting from TetM in strains of *Neisseria* spp., *Kingella denitrificans*, and *Eikenella corrodens*. *Antimicrob Agents Chemother* 32: 765–767.
25. Scharbaai-Vazquez R, Candelas T, Torres-Bauza LJ (2007) Mobilization of the gonococcal 5.2 kb beta-lactamase plasmid pSJ5.2 into *Escherichia coli* by conjugation with several gram-conjugative plasmids. *Plasmid* 57: 156–164.
26. Eisenstein BI, Sox T, Biswas G, Blackman E, Sparling PF (1977) Conjugal transfer of the gonococcal penicillinase plasmid. *Science* 195: 998–1000.
27. Flett F, Humphreys GO, Saunders JR (1981) Intraspecific and intergeneric mobilization of non-conjugative resistance plasmids by a 24.5 megadalton conjugative plasmid of *Neisseria gonorrhoeae*. *J Gen Microbiol* 125: 123–129.
28. Rodriguez-Bonano NM, Torres-Bauza LJ (2004) Molecular analysis of oriT and MobA protein in the 7.4 kb mobilizable beta-lactamase plasmid pSJ7.4 from *Neisseria gonorrhoeae*. *Plasmid* 52: 89–101.
29. Marques C, Xia M, Borthagaray G, Roberts MC (1999) Conjugal transfer of the 3.05 beta-lactamase plasmid by the 25.2 Mda plasmid in *Neisseria gonorrhoeae*. *Sex Transm Dis* 26: 157–159.
30. Xia M, Pang Y, Roberts MC (1995) Detection of two groups of 25.2 Mda Tet M plasmids by polymerase chain reaction of the downstream region. *Mol Cell Probes* 9: 327–332.
31. Turner A, Gough KR, Leeming JP (1999) Molecular epidemiology of tetM genes in *Neisseria gonorrhoeae*. *Sex Transm Infect* 75: 60–66.
32. Korch C, Hagblom P, Ohman H, Goransson M, Normark S (1985) Cryptic plasmid of *Neisseria gonorrhoeae*: complete nucleotide sequence and genetic organization. *J Bacteriol* 163: 430–438.
33. Gascoyne-Binzi DM, Hawkey PM, Heritage J (1994) The distribution of variants of the Tet M determinant in tetracycline-resistant *Neisseria gonorrhoeae*. *J Antimicrob Chemother* 33: 1011–1016.
34. Gharizadeh B, Akhras M, Unemo M, Wretling B, Nyren P, et al. (2005) Detection of gyrA mutations associated with ciprofloxacin resistance in *Neisseria gonorrhoeae* by rapid and reliable pre-programmed short DNA sequencing. *Int J Antimicrob Agents* 26: 486–490.
35. Guiney DG, Jakobson E (1983) Location and nucleotide sequence of the transfer origin of the broad host range plasmid RK2. *Proc Natl Acad Sci U S A* 80: 3595–3598.
36. Giebelhaus LA, Frost L, Lanka E, Gormley EP, Davies JE, et al. (1996) The Tra2 core of the IncP(alpha) plasmid RP4 is required for intergeneric mating between *Escherichia coli* and *Streptomyces lividans*. *J Bacteriol* 178: 6378–6381.
37. Balzer D, Ziegler G, Pansegrau W, Kruft V, Lanka E (1992) KorB protein of promiscuous plasmid RP4 recognizes inverted sequence repetitions in regions essential for conjugative plasmid transfer. *Nucleic Acids Res* 20: 1851–1858.
38. Lioy VS, Martin MT, Camacho AG, Lurz R, Antelmann H, et al. (2006) pSM19035-encoded zeta toxin induces stasis followed by death in a subpopulation of cells. *Microbiology* 152: 2365–2379.
39. Benoit S, Benachour A, Taouji S, Auffray Y, Hartke A (2001) Induction of vap genes encoded by the virulence plasmid of *Rhodococcus equi* during acid tolerance response. *Res Microbiol* 152: 439–449.
40. Katz ME, Strugnell RA, Rood JI (1992) Molecular characterization of a genomic region associated with virulence in *Dichelobacter nodosus*. *Infect Immun* 60: 4586–4592.
41. Catani CF, Azzoni AR, Paula DP, Tada SF, Rosselli LK, et al. (2004) Cloning, expression, and purification of the virulence-associated protein D from *Xylella fastidiosa*. *Protein Expr Purif* 37: 320–326.
42. Daines DA, Jarisch J, Smith AL (2004) Identification and characterization of a nontypeable *Haemophilus influenzae* putative toxin-antitoxin locus. *BMC Microbiol* 4: 30.
43. Zielenkiewicz U, Ceglowski P (2005) The toxin-antitoxin system of the streptococcal plasmid pSM19035. *J Bacteriol* 187: 6094–6105.
44. Khoo SK, Loll B, Chan WT, Shoeman RL, Ngoo L, et al. (2007) Molecular and structural characterization of the PezAT chromosomal toxin-antitoxin system of the human pathogen *Streptococcus pneumoniae*. *J Biol Chem* 282: 19606–19618.
45. Sletvold H, Johnsen PJ, Hamre I, Simonsen GS, Sundsfjord A, et al. (2008) Complete sequence of *Enterococcus faecium* pVEF3 and the detection of an omega-epsilon-zeta toxin-antitoxin module and an ABC transporter. *Plasmid* 60: 75–85.
46. Meinhart A, Alonso JC, Strater N, Saenger W (2003) Crystal structure of the plasmid maintenance system epsilon/zeta: functional mechanism of toxin zeta and inactivation by epsilon 2 zeta 2 complex formation. *Proc Natl Acad Sci U S A* 100: 1661–1666.
47. Galli DM, LeBlanc DJ (1994) Characterization of pVT736-1, a rolling-circle plasmid from the gram-negative bacterium *Actinobacillus actinomycetemcomitans*. *Plasmid* 31: 148–157.
48. Weng S, Lin W, Chang Y, Chang C (1999) Identification of a virulence-associated protein homolog gene and ISRa1 in a plasmid of *Riemerella anatipestifer*. *FEMS Microbiol Lett* 179: 11–19.
49. Fleischmann RD, Adams MD, White O, Clayton RA, Kirkness EF, et al. (1995) Whole-genome random sequencing and assembly of *Haemophilus influenzae* Rd. *Science* 269: 496–512.
50. Marques MV, da Silva AM, Gomes SL (2001) Genetic organization of plasmid pXF51 from the plant pathogen *Xylella fastidiosa*. *Plasmid* 45: 184–199.
51. Katz ME, Wright CL, Gartside TS, Cheetham BF, Doidge CV, et al. (1994) Genetic organization of the duplicated vap region of the *Dichelobacter nodosus* genome. *J Bacteriol* 176: 2663–2669.
52. Jacks S, Giguere S, Prescott JF (2007) In vivo expression of and cell-mediated immune responses to the plasmid-encoded virulence-associated proteins of *Rhodococcus equi* in foals. *Clin Vaccine Immunol* 14: 369–374.
53. Van Melder L, Saavedra De Bast M (2009) Bacterial toxin-antitoxin systems: more than selfish entities? *PLoS Genet* 5: e1000437.
54. Magnuson RD (2007) Hypothetical functions of toxin-antitoxin systems. *J Bacteriol* 189: 6089–6092.
55. Kolader ME, Dukers NH, van der Bij AK, Dierdorp M, Fennema JS, et al. (2006) Molecular epidemiology of *Neisseria gonorrhoeae* in Amsterdam, The Netherlands, shows distinct heterosexual and homosexual networks. *J Clin Microbiol* 44: 2689–2697.
56. Kellogg DS, Jr., Peacock WL, Jr., Deacon WE, Brown L, Pirkle DI (1963) *Neisseria Gonorrhoeae*. I. Virulence Genetically Linked to Clonal Variation. *J Bacteriol* 85: 1274–1279.
57. Morse SA, Bartenstein L (1974) Factors affecting autolysis of *Neisseria gonorrhoeae*. *Proc Soc Exp Biol Med* 145: 1418–1421.
58. Southern EM (1975) Detection of specific sequences among DNA fragments separated by gel electrophoresis. *J Mol Biol* 98: 503–517.
59. Altschul SF, Lipman DJ (1990) Protein database searches for multiple alignments. *Proc Natl Acad Sci U S A* 87: 5509–5513.
60. Thompson JD, Gibson TJ, Plewniak F, Jeanmougin F, Higgins DG (1997) The CLUSTAL\_X windows interface: flexible strategies for multiple sequence alignment aided by quality analysis tools. *Nucleic Acids Res* 25: 4876–4882.
61. Hamilton HL, Schwartz KJ, Dillard JP (2001) Insertion-duplication mutagenesis of *neisseria*: use in characterization of DNA transfer genes in the gonococcal genetic island. *J Bacteriol* 183: 4718–4726.
62. Swanson J, Kraus SJ, Gotschlich EC (1971) Studies on gonococcus infection. I. Pili and zones of adhesion: their relation to gonococcal growth patterns. *J Exp Med* 134: 886–906.
63. Amann E, Ochs B, Abel KJ (1988) Tightly regulated tac promoter vectors useful for the expression of unfused and fused proteins in *Escherichia coli*. *Gene* 69: 301–315.
